# Supplementary material for: Insights on the Nutraceutical Properties of Different Specialty Teas Grown and Processed in a German Tea Garden
Source: MDPI journal article supplement (doi:10.3390/antiox12111943), 2023-10-31
Supplement: s1 [file s1]

**Figure S1.** Averaged UV-Vis spectra (200–500 nm,  $\Delta\lambda = 2$  nm) of the cold tea brews (Cultivar: Korea). Spectra are colored according to the type of tea (brown = black tea; green = green tea; yellow = yellow tea; rusty = oolong tea). In the zoomed and spaced insert, absorptions from 300 to 440 nm are reported.

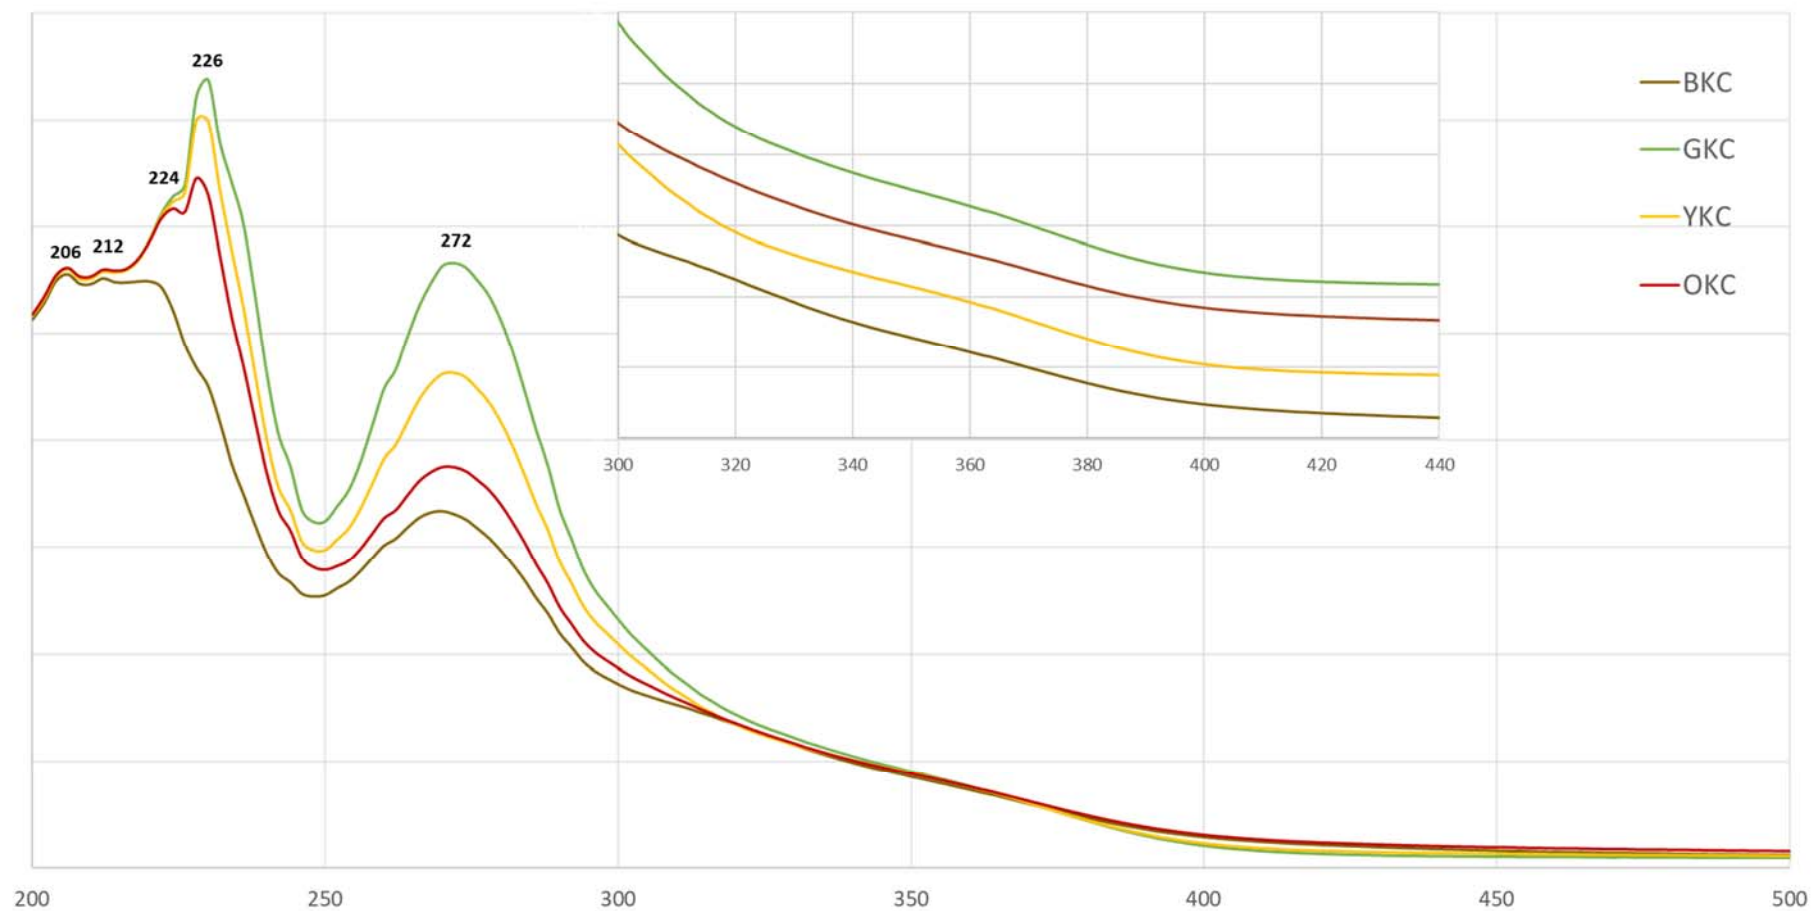

**Figure S2.** Correlogram plot on element content in Tschanara Tea Garden tea leaves. \* denotes a statistically significant correlation at 95% confidence level. \*\* denotes a statistically significant correlation at 99% confidence level.

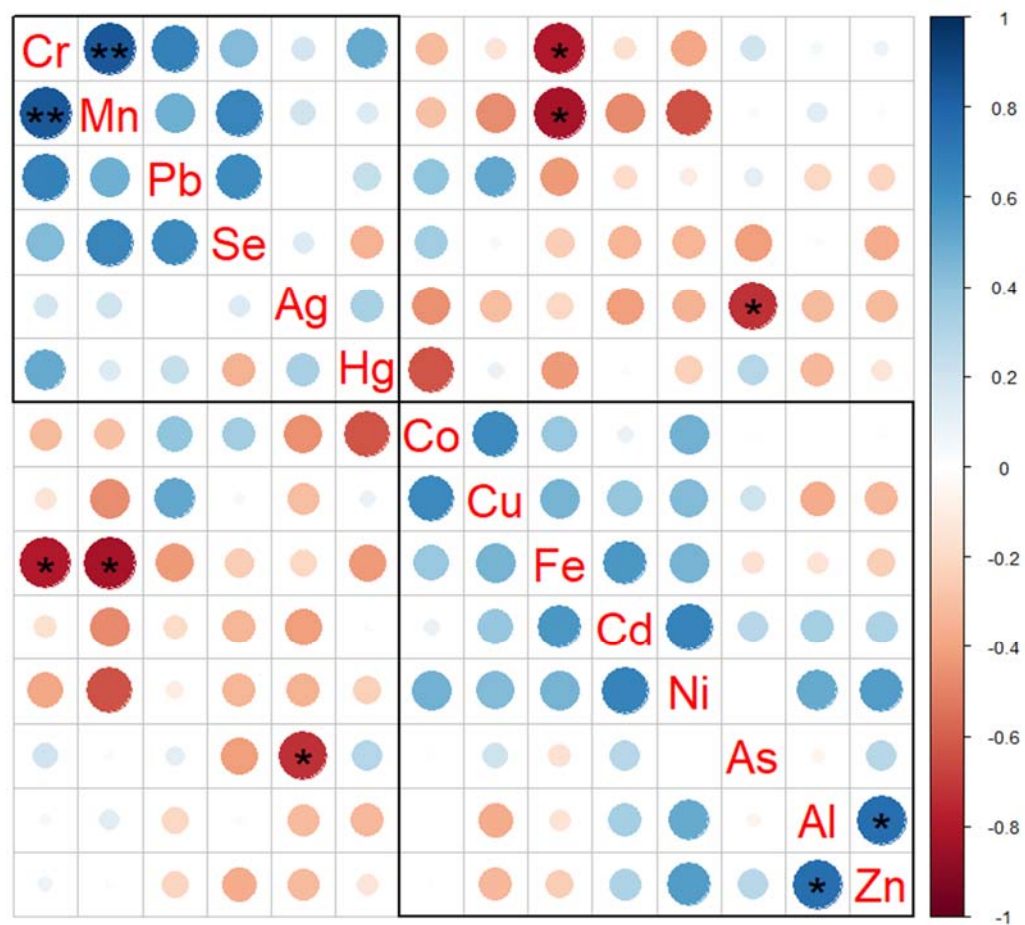

Table S1: Water composition “Sant’Anna”

|                         |              |
|-------------------------|--------------|
| pH                      | 6.8          |
| Total hardness          | 0.98 F       |
| Electric conductivity   | 25.5 µS/cm   |
| Free CO <sub>2</sub>    | 3.0 mg/L     |
| Fixed residue at 180 °C | 22 mg/L      |
| Bicarbonates            | 11 mg/L      |
| Calcium                 | 3.3 mg/L     |
| Nitrates                | 0.88 mg/L    |
| Sodium                  | 1.5 mg/L     |
| Fluorides               | <0.10 mg/L   |
| Ammonium and Nitrites   | not detected |

Label on Bottle with water composition and other parameters



**Sant'Anna**<sup>®</sup>

SORGENTE REBRUANT VINADIO

**NATURALE**

ACQUA MINERALE NATURALE

MICROBIOLOGICAMENTE PURA E OLIGOMINERALE.

MINIMAMENTE MINERALIZZATA.

1950 METRI

LA PIÙ ALTA DELLE SORGENTI REBRUANT

VERIFICATA NEGLI STUDI DI TORINO - DIP. IMC - ANALISI DEL 30/07/2020

SOSTANZE DISCIOLTE IN UN LITRO D'ACQUA (mg/l)

RESIDUO FISSO A 180 °C 22,0 - SODIO 1,5

Calcio 3,3 - Bicarbonati 11,0 - Fluoruri <0,10

Nitrati 0,88 - Ammoniacale e Nitriti non rilevati

INDICATA PER LE DIETE Povere DI SODIO.

PUÒ AVERE EFFETTI DIURETICI.

Durezza totale 18,96 - Temperatura alla sorgente °C 6,6

Conduttività esente spcs. a 20°C µS/cm 25,5

Analisi cartovica dove mg/l 3,0 - pH alla sorgente 6,8

L'alimentazione a seno è da preferire, nei casi ove ciò non sia possibile, quest'acqua minerale può essere utilizzata per la preparazione degli alimenti dei neonati.



**Sant'Anna**<sup>®</sup>

SORGENTE REBRUANT VINADIO

**NATURALE**

15L e

PRENDI IL TAPPO E SOTTO AL CILINDRO DI VETRO C'È UN CODICE A BARRE PER VERIFICARE LA PURITÀ E L'INTEGRITÀ DEL PRODOTTO.

**15L e**

BOTTIGLIA 100% RICICLABILE

**shop.santanna.it** - SORGENTE A CASA TUA

Per informazioni sui punti vendita e sui distributori, o per ricevere il catalogo, invia un'email a [info@santanna.it](mailto:info@santanna.it) o chiama il numero verde 800 20 20 20. Per le informazioni sui punti vendita e sui distributori, o per ricevere il catalogo, invia un'email a [info@santanna.it](mailto:info@santanna.it) o chiama il numero verde 800 20 20 20.

PER INFORMAZIONI SULLA PURITÀ E L'INTEGRITÀ DEL PRODOTTO, SCANNA IL CODICE A BARRE.

SCAN ME

**Table S2.** UV-VIS absorption spectra of the hot and cold brews (200-500 nm) recorded in duplicate at constant intervals ( $\Delta\lambda = 2$  nm) against water as blank on the infusions prepared independently three times and reported as mean values.

| nm  | BAH   | BVH   | BKH   | GKH   | YKH   | OKH   | OAH   | WVH   | BAC   | BVC   | BKC   | GKC   | YKC   | OKC   | OAC   | WVC   |
|-----|-------|-------|-------|-------|-------|-------|-------|-------|-------|-------|-------|-------|-------|-------|-------|-------|
| 200 | 2.607 | 2.542 | 2.606 | 2.621 | 2.598 | 2.618 | 2.586 | 2.548 | 2.554 | 2.516 | 2.570 | 2.582 | 2.586 | 2.592 | 2.582 | 2.548 |
| 202 | 2.689 | 2.624 | 2.688 | 2.709 | 2.678 | 2.703 | 2.673 | 2.635 | 2.634 | 2.592 | 2.648 | 2.667 | 2.664 | 2.675 | 2.665 | 2.635 |
| 204 | 2.799 | 2.730 | 2.793 | 2.802 | 2.780 | 2.807 | 2.776 | 2.737 | 2.738 | 2.695 | 2.750 | 2.767 | 2.767 | 2.775 | 2.768 | 2.735 |
| 206 | 2.832 | 2.761 | 2.830 | 2.847 | 2.814 | 2.843 | 2.814 | 2.773 | 2.771 | 2.727 | 2.781 | 2.804 | 2.802 | 2.809 | 2.809 | 2.773 |
| 208 | 2.787 | 2.715 | 2.788 | 2.801 | 2.783 | 2.800 | 2.771 | 2.732 | 2.729 | 2.683 | 2.737 | 2.758 | 2.759 | 2.769 | 2.763 | 2.728 |
| 210 | 2.788 | 2.711 | 2.784 | 2.807 | 2.782 | 2.806 | 2.776 | 2.732 | 2.722 | 2.677 | 2.735 | 2.761 | 2.758 | 2.769 | 2.760 | 2.731 |
| 212 | 2.819 | 2.741 | 2.814 | 2.833 | 2.805 | 2.831 | 2.802 | 2.759 | 2.751 | 2.700 | 2.762 | 2.793 | 2.792 | 2.800 | 2.797 | 2.760 |
| 214 | 2.825 | 2.728 | 2.812 | 2.837 | 2.799 | 2.826 | 2.801 | 2.755 | 2.747 | 2.686 | 2.744 | 2.791 | 2.787 | 2.796 | 2.796 | 2.754 |
| 216 | 2.830 | 2.727 | 2.820 | 2.845 | 2.817 | 2.838 | 2.809 | 2.764 | 2.759 | 2.677 | 2.742 | 2.804 | 2.798 | 2.804 | 2.803 | 2.764 |
| 218 | 2.875 | 2.750 | 2.861 | 2.891 | 2.859 | 2.883 | 2.855 | 2.808 | 2.798 | 2.678 | 2.747 | 2.845 | 2.841 | 2.849 | 2.855 | 2.808 |
| 220 | 2.971 | 2.769 | 2.941 | 2.983 | 2.951 | 2.970 | 2.947 | 2.898 | 2.868 | 2.656 | 2.747 | 2.940 | 2.936 | 2.932 | 2.944 | 2.899 |
| 222 | 3.092 | 2.761 | 3.029 | 3.107 | 3.067 | 3.091 | 3.064 | 3.008 | 2.942 | 2.593 | 2.720 | 3.061 | 3.047 | 3.039 | 3.062 | 3.013 |
| 224 | 3.162 | 2.648 | 3.042 | 3.190 | 3.134 | 3.154 | 3.129 | 3.063 | 2.927 | 2.434 | 2.609 | 3.142 | 3.116 | 3.084 | 3.143 | 3.086 |
| 226 | 3.216 | 2.464 | 2.985 | 3.255 | 3.177 | 3.187 | 3.165 | 3.073 | 2.824 | 2.228 | 2.451 | 3.194 | 3.158 | 3.068 | 3.201 | 3.121 |
| 228 | 3.549 | 2.328 | 3.014 | 3.668 | 3.518 | 3.450 | 3.468 | 3.283 | 2.788 | 2.075 | 2.340 | 3.614 | 3.501 | 3.226 | 3.568 | 3.418 |
| 230 | 3.533 | 2.226 | 2.929 | 3.752 | 3.502 | 3.412 | 3.489 | 3.197 | 2.675 | 1.977 | 2.252 | 3.690 | 3.493 | 3.146 | 3.580 | 3.380 |
| 232 | 3.212 | 2.032 | 2.691 | 3.446 | 3.178 | 3.106 | 3.190 | 2.830 | 2.426 | 1.805 | 2.085 | 3.394 | 3.167 | 2.864 | 3.278 | 3.027 |
| 234 | 2.948 | 1.813 | 2.445 | 3.264 | 2.876 | 2.818 | 2.947 | 2.476 | 2.158 | 1.612 | 1.893 | 3.208 | 2.890 | 2.577 | 3.041 | 2.698 |
| 236 | 2.715 | 1.658 | 2.262 | 3.066 | 2.607 | 2.582 | 2.731 | 2.208 | 1.957 | 1.476 | 1.750 | 3.013 | 2.623 | 2.348 | 2.817 | 2.436 |
| 238 | 2.456 | 1.505 | 2.071 | 2.749 | 2.291 | 2.314 | 2.456 | 1.937 | 1.752 | 1.345 | 1.606 | 2.677 | 2.308 | 2.092 | 2.523 | 2.153 |
| 240 | 2.212 | 1.366 | 1.896 | 2.409 | 1.993 | 2.055 | 2.188 | 1.694 | 1.561 | 1.226 | 1.472 | 2.313 | 2.003 | 1.848 | 2.231 | 1.897 |
| 242 | 2.042 | 1.273 | 1.778 | 2.142 | 1.780 | 1.868 | 1.992 | 1.532 | 1.427 | 1.146 | 1.378 | 2.028 | 1.782 | 1.671 | 2.009 | 1.726 |
| 244 | 1.957 | 1.236 | 1.723 | 1.996 | 1.673 | 1.776 | 1.891 | 1.458 | 1.368 | 1.113 | 1.336 | 1.882 | 1.676 | 1.581 | 1.893 | 1.650 |
| 246 | 1.836 | 1.190 | 1.648 | 1.805 | 1.538 | 1.639 | 1.742 | 1.375 | 1.283 | 1.079 | 1.281 | 1.675 | 1.528 | 1.452 | 1.716 | 1.560 |
| 248 | 1.806 | 1.189 | 1.633 | 1.752 | 1.497 | 1.597 | 1.699 | 1.358 | 1.262 | 1.077 | 1.268 | 1.621 | 1.487 | 1.407 | 1.661 | 1.547 |
| 250 | 1.813 | 1.208 | 1.643 | 1.755 | 1.498 | 1.591 | 1.697 | 1.374 | 1.266 | 1.094 | 1.275 | 1.624 | 1.489 | 1.394 | 1.650 | 1.569 |
| 252 | 1.863 | 1.263 | 1.688 | 1.835 | 1.555 | 1.619 | 1.739 | 1.449 | 1.297 | 1.145 | 1.308 | 1.693 | 1.537 | 1.412 | 1.676 | 1.650 |
| 254 | 1.919 | 1.315 | 1.731 | 1.917 | 1.610 | 1.658 | 1.791 | 1.516 | 1.333 | 1.188 | 1.339 | 1.769 | 1.591 | 1.438 | 1.718 | 1.721 |
| 256 | 2.015 | 1.393 | 1.802 | 2.061 | 1.711 | 1.731 | 1.884 | 1.629 | 1.395 | 1.256 | 1.389 | 1.901 | 1.683 | 1.493 | 1.800 | 1.833 |
| 258 | 2.139 | 1.489 | 1.890 | 2.247 | 1.839 | 1.825 | 2.006 | 1.772 | 1.472 | 1.339 | 1.450 | 2.068 | 1.798 | 1.565 | 1.908 | 1.971 |
| 260 | 2.272 | 1.585 | 1.979 | 2.442 | 1.969 | 1.923 | 2.134 | 1.919 | 1.549 | 1.418 | 1.509 | 2.240 | 1.914 | 1.637 | 2.022 | 2.108 |
| 262 | 2.342 | 1.640 | 2.026 | 2.540 | 2.035 | 1.977 | 2.204 | 1.994 | 1.594 | 1.461 | 1.542 | 2.331 | 1.978 | 1.675 | 2.086 | 2.176 |

|     |       |       |       |       |       |       |       |       |       |       |       |       |       |       |       |       |
|-----|-------|-------|-------|-------|-------|-------|-------|-------|-------|-------|-------|-------|-------|-------|-------|-------|
| 264 | 2.458 | 1.724 | 2.102 | 2.708 | 2.155 | 2.068 | 2.322 | 2.122 | 1.667 | 1.530 | 1.594 | 2.485 | 2.085 | 1.744 | 2.195 | 2.286 |
| 266 | 2.571 | 1.807 | 2.169 | 2.857 | 2.274 | 2.155 | 2.428 | 2.255 | 1.741 | 1.599 | 1.640 | 2.629 | 2.189 | 1.811 | 2.307 | 2.388 |
| 268 | 2.659 | 1.867 | 2.213 | 2.981 | 2.361 | 2.218 | 2.515 | 2.356 | 1.793 | 1.644 | 1.665 | 2.736 | 2.264 | 1.853 | 2.391 | 2.465 |
| 270 | 2.726 | 1.906 | 2.233 | 3.096 | 2.422 | 2.260 | 2.584 | 2.432 | 1.830 | 1.672 | 1.671 | 2.818 | 2.310 | 1.877 | 2.456 | 2.513 |
| 272 | 2.753 | 1.921 | 2.218 | 3.109 | 2.444 | 2.270 | 2.606 | 2.472 | 1.846 | 1.680 | 1.657 | 2.832 | 2.315 | 1.877 | 2.488 | 2.529 |
| 274 | 2.747 | 1.911 | 2.188 | 3.094 | 2.429 | 2.254 | 2.598 | 2.476 | 1.843 | 1.668 | 1.632 | 2.810 | 2.293 | 1.857 | 2.488 | 2.513 |
| 276 | 2.695 | 1.866 | 2.129 | 3.038 | 2.379 | 2.207 | 2.547 | 2.437 | 1.816 | 1.628 | 1.589 | 2.750 | 2.238 | 1.816 | 2.454 | 2.459 |
| 278 | 2.634 | 1.804 | 2.062 | 2.960 | 2.317 | 2.147 | 2.486 | 2.378 | 1.776 | 1.574 | 1.543 | 2.676 | 2.174 | 1.768 | 2.405 | 2.388 |
| 280 | 2.526 | 1.711 | 1.973 | 2.850 | 2.221 | 2.061 | 2.388 | 2.279 | 1.712 | 1.496 | 1.485 | 2.561 | 2.083 | 1.700 | 2.318 | 2.284 |
| 282 | 2.406 | 1.601 | 1.874 | 2.710 | 2.102 | 1.955 | 2.271 | 2.159 | 1.633 | 1.404 | 1.419 | 2.413 | 1.970 | 1.617 | 2.207 | 2.158 |
| 284 | 2.249 | 1.477 | 1.762 | 2.509 | 1.960 | 1.833 | 2.115 | 2.009 | 1.540 | 1.300 | 1.346 | 2.234 | 1.842 | 1.525 | 2.067 | 2.008 |
| 286 | 2.071 | 1.331 | 1.635 | 2.302 | 1.807 | 1.696 | 1.948 | 1.843 | 1.433 | 1.179 | 1.262 | 2.047 | 1.702 | 1.421 | 1.910 | 1.840 |
| 288 | 1.914 | 1.204 | 1.522 | 2.114 | 1.670 | 1.578 | 1.796 | 1.690 | 1.339 | 1.072 | 1.189 | 1.882 | 1.583 | 1.330 | 1.769 | 1.691 |
| 290 | 1.719 | 1.048 | 1.384 | 1.887 | 1.507 | 1.431 | 1.609 | 1.505 | 1.223 | 0.942 | 1.097 | 1.679 | 1.434 | 1.219 | 1.593 | 1.505 |
| 292 | 1.583 | 0.941 | 1.288 | 1.729 | 1.390 | 1.329 | 1.480 | 1.371 | 1.141 | 0.852 | 1.034 | 1.542 | 1.332 | 1.141 | 1.472 | 1.374 |
| 294 | 1.438 | 0.828 | 1.187 | 1.563 | 1.270 | 1.224 | 1.341 | 1.227 | 1.055 | 0.759 | 0.966 | 1.398 | 1.227 | 1.064 | 1.349 | 1.232 |
| 296 | 1.336 | 0.751 | 1.116 | 1.445 | 1.184 | 1.148 | 1.245 | 1.120 | 0.997 | 0.696 | 0.921 | 1.299 | 1.153 | 1.010 | 1.264 | 1.126 |
| 298 | 1.262 | 0.700 | 1.067 | 1.356 | 1.117 | 1.094 | 1.175 | 1.037 | 0.955 | 0.651 | 0.889 | 1.229 | 1.099 | 0.971 | 1.203 | 1.044 |
| 300 | 1.193 | 0.655 | 1.023 | 1.272 | 1.056 | 1.043 | 1.108 | 0.957 | 0.915 | 0.613 | 0.861 | 1.161 | 1.047 | 0.935 | 1.145 | 0.963 |
| 302 | 1.128 | 0.616 | 0.983 | 1.191 | 0.995 | 0.994 | 1.045 | 0.877 | 0.878 | 0.580 | 0.834 | 1.096 | 0.995 | 0.900 | 1.091 | 0.884 |
| 304 | 1.075 | 0.585 | 0.952 | 1.123 | 0.942 | 0.952 | 0.991 | 0.808 | 0.849 | 0.554 | 0.815 | 1.042 | 0.951 | 0.872 | 1.048 | 0.815 |
| 306 | 1.025 | 0.557 | 0.924 | 1.056 | 0.890 | 0.913 | 0.940 | 0.741 | 0.823 | 0.531 | 0.797 | 0.991 | 0.909 | 0.845 | 1.007 | 0.749 |
| 308 | 0.974 | 0.529 | 0.895 | 0.989 | 0.837 | 0.872 | 0.888 | 0.671 | 0.796 | 0.507 | 0.779 | 0.939 | 0.865 | 0.818 | 0.965 | 0.683 |
| 310 | 0.930 | 0.506 | 0.871 | 0.932 | 0.792 | 0.838 | 0.844 | 0.613 | 0.772 | 0.487 | 0.763 | 0.896 | 0.828 | 0.793 | 0.928 | 0.629 |
| 312 | 0.889 | 0.485 | 0.848 | 0.881 | 0.749 | 0.806 | 0.803 | 0.560 | 0.747 | 0.468 | 0.748 | 0.856 | 0.794 | 0.770 | 0.893 | 0.580 |
| 314 | 0.843 | 0.460 | 0.821 | 0.829 | 0.708 | 0.771 | 0.759 | 0.507 | 0.718 | 0.446 | 0.728 | 0.814 | 0.757 | 0.745 | 0.854 | 0.530 |
| 316 | 0.806 | 0.442 | 0.800 | 0.789 | 0.674 | 0.744 | 0.725 | 0.466 | 0.693 | 0.429 | 0.712 | 0.781 | 0.728 | 0.723 | 0.822 | 0.492 |
| 318 | 0.766 | 0.421 | 0.776 | 0.750 | 0.642 | 0.716 | 0.689 | 0.428 | 0.663 | 0.410 | 0.692 | 0.747 | 0.698 | 0.700 | 0.787 | 0.455 |
| 320 | 0.733 | 0.405 | 0.755 | 0.718 | 0.616 | 0.693 | 0.661 | 0.398 | 0.637 | 0.394 | 0.674 | 0.720 | 0.675 | 0.679 | 0.758 | 0.427 |
| 322 | 0.698 | 0.388 | 0.733 | 0.690 | 0.593 | 0.669 | 0.632 | 0.372 | 0.607 | 0.377 | 0.653 | 0.693 | 0.650 | 0.658 | 0.726 | 0.401 |
| 324 | 0.667 | 0.374 | 0.713 | 0.666 | 0.572 | 0.649 | 0.608 | 0.351 | 0.579 | 0.362 | 0.634 | 0.670 | 0.630 | 0.638 | 0.697 | 0.380 |
| 326 | 0.638 | 0.361 | 0.694 | 0.645 | 0.555 | 0.631 | 0.586 | 0.334 | 0.551 | 0.347 | 0.615 | 0.649 | 0.612 | 0.620 | 0.668 | 0.362 |
| 328 | 0.612 | 0.349 | 0.677 | 0.627 | 0.540 | 0.614 | 0.566 | 0.320 | 0.525 | 0.334 | 0.596 | 0.630 | 0.595 | 0.602 | 0.641 | 0.347 |
| 330 | 0.585 | 0.337 | 0.658 | 0.608 | 0.526 | 0.597 | 0.545 | 0.308 | 0.496 | 0.321 | 0.577 | 0.610 | 0.579 | 0.584 | 0.611 | 0.332 |
| 332 | 0.558 | 0.325 | 0.640 | 0.590 | 0.512 | 0.580 | 0.525 | 0.297 | 0.467 | 0.307 | 0.558 | 0.590 | 0.562 | 0.566 | 0.581 | 0.318 |

|     |       |       |       |       |       |       |       |       |       |       |       |       |       |       |       |       |
|-----|-------|-------|-------|-------|-------|-------|-------|-------|-------|-------|-------|-------|-------|-------|-------|-------|
| 334 | 0.535 | 0.316 | 0.625 | 0.574 | 0.499 | 0.566 | 0.507 | 0.288 | 0.442 | 0.295 | 0.541 | 0.573 | 0.548 | 0.550 | 0.553 | 0.306 |
| 336 | 0.511 | 0.306 | 0.609 | 0.557 | 0.487 | 0.551 | 0.490 | 0.279 | 0.416 | 0.284 | 0.524 | 0.555 | 0.533 | 0.534 | 0.525 | 0.294 |
| 338 | 0.489 | 0.297 | 0.595 | 0.541 | 0.475 | 0.537 | 0.472 | 0.271 | 0.391 | 0.273 | 0.508 | 0.539 | 0.520 | 0.519 | 0.497 | 0.283 |
| 340 | 0.468 | 0.289 | 0.580 | 0.525 | 0.463 | 0.523 | 0.456 | 0.263 | 0.368 | 0.262 | 0.493 | 0.523 | 0.506 | 0.505 | 0.470 | 0.272 |
| 342 | 0.449 | 0.280 | 0.567 | 0.510 | 0.452 | 0.510 | 0.440 | 0.256 | 0.347 | 0.253 | 0.478 | 0.508 | 0.493 | 0.491 | 0.444 | 0.262 |
| 344 | 0.430 | 0.272 | 0.553 | 0.495 | 0.441 | 0.497 | 0.424 | 0.249 | 0.326 | 0.243 | 0.464 | 0.492 | 0.480 | 0.478 | 0.419 | 0.252 |
| 346 | 0.414 | 0.266 | 0.541 | 0.481 | 0.430 | 0.485 | 0.410 | 0.241 | 0.308 | 0.235 | 0.452 | 0.479 | 0.469 | 0.465 | 0.396 | 0.243 |
| 348 | 0.398 | 0.259 | 0.530 | 0.467 | 0.419 | 0.474 | 0.396 | 0.235 | 0.292 | 0.228 | 0.440 | 0.465 | 0.457 | 0.453 | 0.375 | 0.235 |
| 350 | 0.383 | 0.253 | 0.516 | 0.453 | 0.409 | 0.461 | 0.382 | 0.229 | 0.275 | 0.220 | 0.427 | 0.451 | 0.445 | 0.441 | 0.354 | 0.227 |
| 352 | 0.369 | 0.247 | 0.504 | 0.440 | 0.398 | 0.450 | 0.370 | 0.223 | 0.262 | 0.213 | 0.414 | 0.438 | 0.432 | 0.429 | 0.335 | 0.219 |
| 354 | 0.356 | 0.241 | 0.491 | 0.426 | 0.387 | 0.438 | 0.357 | 0.217 | 0.248 | 0.206 | 0.402 | 0.423 | 0.420 | 0.417 | 0.316 | 0.211 |
| 356 | 0.344 | 0.235 | 0.478 | 0.414 | 0.376 | 0.426 | 0.345 | 0.212 | 0.236 | 0.200 | 0.390 | 0.410 | 0.407 | 0.405 | 0.300 | 0.205 |
| 358 | 0.333 | 0.230 | 0.464 | 0.401 | 0.364 | 0.414 | 0.334 | 0.206 | 0.226 | 0.194 | 0.377 | 0.396 | 0.393 | 0.393 | 0.285 | 0.198 |
| 360 | 0.322 | 0.225 | 0.451 | 0.388 | 0.353 | 0.401 | 0.323 | 0.201 | 0.216 | 0.189 | 0.365 | 0.381 | 0.379 | 0.380 | 0.271 | 0.191 |
| 362 | 0.312 | 0.220 | 0.436 | 0.375 | 0.341 | 0.389 | 0.311 | 0.196 | 0.206 | 0.184 | 0.352 | 0.366 | 0.365 | 0.367 | 0.258 | 0.185 |
| 364 | 0.305 | 0.217 | 0.424 | 0.363 | 0.329 | 0.378 | 0.302 | 0.191 | 0.200 | 0.179 | 0.340 | 0.353 | 0.352 | 0.355 | 0.248 | 0.180 |
| 366 | 0.295 | 0.212 | 0.408 | 0.350 | 0.317 | 0.365 | 0.291 | 0.187 | 0.192 | 0.174 | 0.327 | 0.337 | 0.336 | 0.341 | 0.236 | 0.173 |
| 368 | 0.286 | 0.207 | 0.392 | 0.337 | 0.304 | 0.352 | 0.281 | 0.182 | 0.185 | 0.170 | 0.313 | 0.321 | 0.320 | 0.327 | 0.225 | 0.167 |
| 370 | 0.278 | 0.202 | 0.376 | 0.324 | 0.291 | 0.339 | 0.270 | 0.176 | 0.177 | 0.165 | 0.299 | 0.303 | 0.303 | 0.313 | 0.215 | 0.161 |
| 372 | 0.269 | 0.198 | 0.360 | 0.311 | 0.278 | 0.326 | 0.260 | 0.172 | 0.171 | 0.160 | 0.285 | 0.286 | 0.287 | 0.299 | 0.206 | 0.155 |
| 374 | 0.262 | 0.193 | 0.345 | 0.298 | 0.265 | 0.314 | 0.250 | 0.167 | 0.165 | 0.156 | 0.271 | 0.269 | 0.271 | 0.285 | 0.197 | 0.150 |
| 376 | 0.253 | 0.189 | 0.329 | 0.284 | 0.252 | 0.301 | 0.240 | 0.162 | 0.159 | 0.152 | 0.258 | 0.252 | 0.254 | 0.272 | 0.188 | 0.144 |
| 378 | 0.246 | 0.185 | 0.314 | 0.272 | 0.240 | 0.289 | 0.231 | 0.157 | 0.154 | 0.147 | 0.245 | 0.236 | 0.239 | 0.258 | 0.180 | 0.139 |
| 380 | 0.240 | 0.181 | 0.299 | 0.259 | 0.227 | 0.278 | 0.222 | 0.153 | 0.149 | 0.144 | 0.233 | 0.220 | 0.224 | 0.246 | 0.173 | 0.134 |
| 382 | 0.233 | 0.177 | 0.284 | 0.247 | 0.216 | 0.266 | 0.213 | 0.148 | 0.144 | 0.140 | 0.220 | 0.204 | 0.208 | 0.233 | 0.166 | 0.129 |
| 384 | 0.226 | 0.172 | 0.270 | 0.235 | 0.205 | 0.255 | 0.204 | 0.144 | 0.139 | 0.136 | 0.209 | 0.188 | 0.194 | 0.222 | 0.159 | 0.123 |
| 386 | 0.220 | 0.169 | 0.257 | 0.224 | 0.194 | 0.245 | 0.196 | 0.139 | 0.135 | 0.132 | 0.198 | 0.174 | 0.181 | 0.210 | 0.152 | 0.118 |
| 388 | 0.213 | 0.165 | 0.245 | 0.213 | 0.184 | 0.235 | 0.188 | 0.135 | 0.131 | 0.129 | 0.188 | 0.161 | 0.169 | 0.200 | 0.146 | 0.114 |
| 390 | 0.208 | 0.162 | 0.234 | 0.204 | 0.176 | 0.226 | 0.182 | 0.131 | 0.128 | 0.126 | 0.179 | 0.149 | 0.157 | 0.191 | 0.141 | 0.110 |
| 392 | 0.202 | 0.158 | 0.223 | 0.195 | 0.167 | 0.217 | 0.174 | 0.127 | 0.124 | 0.123 | 0.169 | 0.137 | 0.146 | 0.182 | 0.136 | 0.105 |
| 394 | 0.197 | 0.155 | 0.213 | 0.186 | 0.159 | 0.210 | 0.168 | 0.124 | 0.120 | 0.120 | 0.162 | 0.127 | 0.137 | 0.174 | 0.131 | 0.102 |
| 396 | 0.192 | 0.152 | 0.204 | 0.179 | 0.152 | 0.203 | 0.162 | 0.120 | 0.117 | 0.117 | 0.155 | 0.118 | 0.128 | 0.166 | 0.126 | 0.098 |
| 398 | 0.187 | 0.149 | 0.196 | 0.172 | 0.146 | 0.196 | 0.157 | 0.118 | 0.115 | 0.115 | 0.148 | 0.109 | 0.121 | 0.160 | 0.122 | 0.095 |
| 400 | 0.182 | 0.146 | 0.189 | 0.166 | 0.141 | 0.191 | 0.152 | 0.115 | 0.112 | 0.112 | 0.142 | 0.102 | 0.115 | 0.154 | 0.118 | 0.092 |
| 402 | 0.177 | 0.143 | 0.181 | 0.160 | 0.136 | 0.185 | 0.146 | 0.112 | 0.109 | 0.110 | 0.137 | 0.095 | 0.108 | 0.148 | 0.114 | 0.089 |

|     |       |       |       |       |       |       |       |       |       |       |       |       |       |       |       |       |
|-----|-------|-------|-------|-------|-------|-------|-------|-------|-------|-------|-------|-------|-------|-------|-------|-------|
| 404 | 0.173 | 0.140 | 0.175 | 0.155 | 0.132 | 0.180 | 0.142 | 0.109 | 0.106 | 0.108 | 0.132 | 0.090 | 0.103 | 0.143 | 0.111 | 0.087 |
| 406 | 0.169 | 0.138 | 0.169 | 0.151 | 0.128 | 0.176 | 0.138 | 0.107 | 0.104 | 0.106 | 0.128 | 0.085 | 0.099 | 0.139 | 0.108 | 0.084 |
| 408 | 0.166 | 0.136 | 0.164 | 0.147 | 0.125 | 0.172 | 0.135 | 0.105 | 0.103 | 0.104 | 0.124 | 0.081 | 0.095 | 0.135 | 0.106 | 0.083 |
| 410 | 0.162 | 0.132 | 0.159 | 0.143 | 0.122 | 0.168 | 0.131 | 0.102 | 0.100 | 0.101 | 0.120 | 0.077 | 0.091 | 0.131 | 0.103 | 0.080 |
| 412 | 0.158 | 0.131 | 0.155 | 0.140 | 0.118 | 0.165 | 0.128 | 0.101 | 0.098 | 0.099 | 0.117 | 0.074 | 0.089 | 0.128 | 0.101 | 0.079 |
| 414 | 0.154 | 0.128 | 0.150 | 0.137 | 0.116 | 0.161 | 0.125 | 0.099 | 0.096 | 0.098 | 0.113 | 0.071 | 0.086 | 0.125 | 0.099 | 0.077 |
| 416 | 0.151 | 0.125 | 0.146 | 0.135 | 0.115 | 0.158 | 0.122 | 0.097 | 0.094 | 0.096 | 0.110 | 0.068 | 0.083 | 0.122 | 0.096 | 0.075 |
| 418 | 0.148 | 0.124 | 0.143 | 0.133 | 0.113 | 0.156 | 0.121 | 0.096 | 0.093 | 0.094 | 0.108 | 0.066 | 0.082 | 0.120 | 0.095 | 0.074 |
| 420 | 0.145 | 0.121 | 0.139 | 0.130 | 0.111 | 0.153 | 0.118 | 0.094 | 0.091 | 0.092 | 0.105 | 0.064 | 0.080 | 0.117 | 0.093 | 0.073 |
| 422 | 0.143 | 0.120 | 0.136 | 0.127 | 0.109 | 0.151 | 0.116 | 0.093 | 0.090 | 0.091 | 0.103 | 0.062 | 0.079 | 0.116 | 0.091 | 0.072 |
| 424 | 0.140 | 0.118 | 0.133 | 0.126 | 0.107 | 0.149 | 0.114 | 0.091 | 0.088 | 0.089 | 0.101 | 0.061 | 0.077 | 0.114 | 0.089 | 0.071 |
| 426 | 0.137 | 0.116 | 0.130 | 0.123 | 0.106 | 0.147 | 0.112 | 0.090 | 0.087 | 0.088 | 0.099 | 0.060 | 0.076 | 0.112 | 0.088 | 0.070 |
| 428 | 0.135 | 0.114 | 0.127 | 0.121 | 0.104 | 0.144 | 0.110 | 0.089 | 0.085 | 0.086 | 0.097 | 0.058 | 0.074 | 0.110 | 0.087 | 0.069 |
| 430 | 0.132 | 0.112 | 0.124 | 0.119 | 0.103 | 0.142 | 0.108 | 0.088 | 0.083 | 0.084 | 0.095 | 0.057 | 0.073 | 0.108 | 0.085 | 0.067 |
| 432 | 0.129 | 0.110 | 0.121 | 0.117 | 0.102 | 0.140 | 0.106 | 0.086 | 0.082 | 0.083 | 0.092 | 0.056 | 0.072 | 0.106 | 0.083 | 0.066 |
| 434 | 0.126 | 0.109 | 0.119 | 0.116 | 0.100 | 0.138 | 0.104 | 0.085 | 0.081 | 0.081 | 0.091 | 0.055 | 0.071 | 0.105 | 0.082 | 0.066 |
| 436 | 0.124 | 0.107 | 0.116 | 0.114 | 0.099 | 0.136 | 0.103 | 0.084 | 0.079 | 0.080 | 0.089 | 0.055 | 0.071 | 0.104 | 0.081 | 0.065 |
| 438 | 0.121 | 0.105 | 0.114 | 0.113 | 0.099 | 0.134 | 0.101 | 0.083 | 0.078 | 0.079 | 0.088 | 0.053 | 0.070 | 0.102 | 0.080 | 0.064 |
| 440 | 0.119 | 0.103 | 0.111 | 0.112 | 0.098 | 0.133 | 0.099 | 0.082 | 0.076 | 0.077 | 0.086 | 0.053 | 0.069 | 0.101 | 0.078 | 0.063 |
| 442 | 0.117 | 0.102 | 0.109 | 0.110 | 0.096 | 0.131 | 0.098 | 0.081 | 0.076 | 0.076 | 0.084 | 0.053 | 0.069 | 0.100 | 0.078 | 0.063 |
| 444 | 0.114 | 0.100 | 0.106 | 0.110 | 0.096 | 0.129 | 0.096 | 0.080 | 0.074 | 0.075 | 0.083 | 0.052 | 0.068 | 0.098 | 0.076 | 0.062 |
| 446 | 0.112 | 0.098 | 0.104 | 0.109 | 0.095 | 0.128 | 0.094 | 0.079 | 0.073 | 0.074 | 0.081 | 0.052 | 0.067 | 0.098 | 0.075 | 0.061 |
| 448 | 0.109 | 0.097 | 0.102 | 0.107 | 0.094 | 0.126 | 0.093 | 0.078 | 0.072 | 0.072 | 0.080 | 0.051 | 0.067 | 0.096 | 0.074 | 0.060 |
| 450 | 0.107 | 0.095 | 0.100 | 0.107 | 0.093 | 0.125 | 0.092 | 0.077 | 0.071 | 0.071 | 0.078 | 0.051 | 0.066 | 0.096 | 0.073 | 0.060 |
| 452 | 0.105 | 0.094 | 0.098 | 0.107 | 0.093 | 0.124 | 0.090 | 0.077 | 0.070 | 0.071 | 0.077 | 0.051 | 0.066 | 0.095 | 0.072 | 0.059 |
| 454 | 0.103 | 0.093 | 0.096 | 0.106 | 0.092 | 0.123 | 0.089 | 0.075 | 0.069 | 0.069 | 0.076 | 0.050 | 0.065 | 0.094 | 0.071 | 0.058 |
| 456 | 0.101 | 0.091 | 0.094 | 0.105 | 0.092 | 0.121 | 0.087 | 0.075 | 0.068 | 0.068 | 0.075 | 0.050 | 0.064 | 0.093 | 0.070 | 0.058 |
| 458 | 0.099 | 0.089 | 0.092 | 0.105 | 0.091 | 0.120 | 0.086 | 0.074 | 0.066 | 0.067 | 0.074 | 0.049 | 0.064 | 0.092 | 0.069 | 0.057 |
| 460 | 0.096 | 0.088 | 0.090 | 0.103 | 0.091 | 0.118 | 0.085 | 0.073 | 0.065 | 0.066 | 0.072 | 0.049 | 0.063 | 0.091 | 0.068 | 0.057 |
| 462 | 0.096 | 0.088 | 0.089 | 0.103 | 0.090 | 0.117 | 0.084 | 0.073 | 0.065 | 0.066 | 0.072 | 0.049 | 0.063 | 0.090 | 0.068 | 0.056 |
| 464 | 0.094 | 0.086 | 0.088 | 0.102 | 0.090 | 0.116 | 0.082 | 0.072 | 0.064 | 0.065 | 0.071 | 0.049 | 0.063 | 0.090 | 0.067 | 0.056 |
| 466 | 0.092 | 0.085 | 0.086 | 0.101 | 0.089 | 0.115 | 0.081 | 0.071 | 0.063 | 0.064 | 0.070 | 0.048 | 0.062 | 0.089 | 0.066 | 0.055 |
| 468 | 0.090 | 0.084 | 0.084 | 0.100 | 0.088 | 0.114 | 0.080 | 0.070 | 0.062 | 0.063 | 0.068 | 0.048 | 0.061 | 0.088 | 0.065 | 0.054 |
| 470 | 0.089 | 0.083 | 0.083 | 0.100 | 0.087 | 0.113 | 0.079 | 0.070 | 0.061 | 0.062 | 0.068 | 0.048 | 0.061 | 0.087 | 0.064 | 0.054 |
| 472 | 0.088 | 0.082 | 0.082 | 0.100 | 0.087 | 0.112 | 0.079 | 0.070 | 0.061 | 0.062 | 0.068 | 0.048 | 0.061 | 0.087 | 0.064 | 0.054 |

|     |       |       |       |       |       |       |       |       |       |       |       |       |       |       |       |       |
|-----|-------|-------|-------|-------|-------|-------|-------|-------|-------|-------|-------|-------|-------|-------|-------|-------|
| 474 | 0.086 | 0.081 | 0.080 | 0.099 | 0.086 | 0.110 | 0.077 | 0.068 | 0.060 | 0.061 | 0.066 | 0.047 | 0.060 | 0.085 | 0.062 | 0.053 |
| 476 | 0.084 | 0.079 | 0.079 | 0.098 | 0.086 | 0.110 | 0.076 | 0.068 | 0.059 | 0.060 | 0.065 | 0.047 | 0.060 | 0.084 | 0.062 | 0.053 |
| 478 | 0.084 | 0.080 | 0.079 | 0.098 | 0.086 | 0.109 | 0.075 | 0.068 | 0.059 | 0.060 | 0.065 | 0.047 | 0.060 | 0.085 | 0.062 | 0.053 |
| 480 | 0.082 | 0.079 | 0.078 | 0.098 | 0.085 | 0.108 | 0.075 | 0.067 | 0.058 | 0.060 | 0.064 | 0.047 | 0.059 | 0.084 | 0.061 | 0.052 |
| 482 | 0.081 | 0.077 | 0.077 | 0.098 | 0.086 | 0.107 | 0.074 | 0.067 | 0.058 | 0.059 | 0.064 | 0.047 | 0.059 | 0.083 | 0.060 | 0.052 |
| 484 | 0.079 | 0.076 | 0.075 | 0.098 | 0.085 | 0.106 | 0.073 | 0.066 | 0.057 | 0.058 | 0.063 | 0.046 | 0.059 | 0.083 | 0.059 | 0.051 |
| 486 | 0.079 | 0.077 | 0.074 | 0.096 | 0.083 | 0.105 | 0.072 | 0.065 | 0.057 | 0.058 | 0.062 | 0.047 | 0.059 | 0.081 | 0.059 | 0.051 |
| 488 | 0.077 | 0.075 | 0.073 | 0.096 | 0.084 | 0.104 | 0.071 | 0.065 | 0.056 | 0.057 | 0.061 | 0.046 | 0.058 | 0.081 | 0.058 | 0.051 |
| 490 | 0.077 | 0.076 | 0.073 | 0.096 | 0.083 | 0.104 | 0.071 | 0.065 | 0.056 | 0.057 | 0.061 | 0.046 | 0.059 | 0.081 | 0.058 | 0.051 |
| 492 | 0.075 | 0.074 | 0.072 | 0.095 | 0.083 | 0.103 | 0.069 | 0.065 | 0.055 | 0.056 | 0.060 | 0.046 | 0.058 | 0.080 | 0.057 | 0.050 |
| 494 | 0.074 | 0.074 | 0.071 | 0.095 | 0.081 | 0.102 | 0.069 | 0.064 | 0.055 | 0.056 | 0.060 | 0.046 | 0.058 | 0.079 | 0.057 | 0.050 |
| 496 | 0.073 | 0.072 | 0.070 | 0.095 | 0.082 | 0.101 | 0.068 | 0.064 | 0.054 | 0.055 | 0.059 | 0.046 | 0.057 | 0.079 | 0.056 | 0.049 |
| 498 | 0.072 | 0.072 | 0.069 | 0.094 | 0.081 | 0.100 | 0.067 | 0.063 | 0.054 | 0.055 | 0.059 | 0.046 | 0.057 | 0.078 | 0.056 | 0.049 |
| 500 | 0.071 | 0.071 | 0.069 | 0.093 | 0.080 | 0.099 | 0.066 | 0.063 | 0.053 | 0.054 | 0.058 | 0.045 | 0.056 | 0.077 | 0.055 | 0.049 |



**Table S3.** Eigenvalues and explained and cumulative variance, for the first five principal components (PC) obtained from the analysis of the total phenol (TPC) and flavonoid (TFC) content, antioxidant activity (ORAC, ABTS, FRAP) and UV-Vis absorptions (200-500 nm) of the three cold brews obtained from each of the eight tea samples.

**Principal Component Analysis:**

|                 | F1     | F2     | F3     | F4     | F5     |
|-----------------|--------|--------|--------|--------|--------|
| Eigenvalue      | 72.999 | 63.561 | 12.126 | 4.572  | 1.412  |
| Variability (%) | 46.794 | 40.744 | 7.773  | 2.931  | 0.905  |
| Cumulative %    | 46.794 | 87.538 | 95.312 | 98.242 | 99.147 |

**Table S4.** Essential elements content (mg kg<sup>-1</sup>) in differently processed tea leaves from Tschanara Tea Garden.

|    | Co                       | Cu                     | Fe                  | Mn                  | Se                       | V      | Zn                    |
|----|--------------------------|------------------------|---------------------|---------------------|--------------------------|--------|-----------------------|
| BA | 0.05±0.01 <sup>d</sup>   | 13.3±0.5 <sup>b</sup>  | 76±9 <sup>a</sup>   | 375±2 <sup>g</sup>  | 0.09±0.01 <sup>a</sup>   | <0.006 | 23±1 <sup>d</sup>     |
| BK | 0.09±0.002 <sup>c</sup>  | 12.2±0.3 <sup>bc</sup> | 49±1 <sup>de</sup>  | 628±5 <sup>e</sup>  | 0.09±0.02 <sup>a</sup>   | <0.006 | 33.2±0.3 <sup>b</sup> |
| BV | 0.25±0.01 <sup>a</sup>   | 16.9±0.3 <sup>a</sup>  | 68±2 <sup>ab</sup>  | 535±9 <sup>f</sup>  | 0.14±0.02 <sup>a</sup>   | <0.006 | 21.9±0.2 <sup>d</sup> |
| GK | 0.06±0.01 <sup>d</sup>   | 13±0.3 <sup>b</sup>    | 50±2 <sup>de</sup>  | 709±9 <sup>c</sup>  | 0.11±0.03 <sup>a</sup>   | <0.006 | 24.3±0.1 <sup>c</sup> |
| OA | 0.11±0.01 <sup>c</sup>   | 11.3±0.6 <sup>cd</sup> | 59±3 <sup>bcd</sup> | 680±5 <sup>d</sup>  | 0.118±0.001 <sup>a</sup> | <0.006 | 38.2±0.2 <sup>a</sup> |
| OK | 0.061±0.002 <sup>d</sup> | 11.8±0.3 <sup>cd</sup> | 45±2 <sup>e</sup>   | 1086±2 <sup>a</sup> | 0.14±0.05 <sup>a</sup>   | <0.006 | 24.1±0.1 <sup>c</sup> |
| WV | 0.15±0.01 <sup>b</sup>   | 11±0.1 <sup>d</sup>    | 61±1 <sup>bc</sup>  | 684±1 <sup>d</sup>  | 0.13±0.02 <sup>a</sup>   | <0.006 | 23.9±0.2 <sup>c</sup> |
| YK | 0.05±0.01 <sup>d</sup>   | 11.7±0.6 <sup>cd</sup> | 56±3 <sup>c</sup>   | 778±4 <sup>b</sup>  | 0.13±0.02 <sup>a</sup>   | <0.006 | 19.3±0.3 <sup>e</sup> |

**Table S5.** Potentially toxic elements content (mg kg<sup>-1</sup>) in differently processed tea leaves from Tschanara Tea Garden.

|    | Ag                           | Al                                | As                     | Cd                         | Cr                       | Hg                         | Ni                    | Pb                       |
|----|------------------------------|-----------------------------------|------------------------|----------------------------|--------------------------|----------------------------|-----------------------|--------------------------|
| BA | 0.0066±0.0003 <sup>b</sup>   | 1680±158 <sup>e</sup>             | 0.1±0.01 <sup>a</sup>  | 0.071±0.004 <sup>a</sup>   | 0.341±0.005 <sup>d</sup> | 0.01±0.001 <sup>b</sup>    | 10.2±0.2 <sup>b</sup> | 0.24±0.02 <sup>e</sup>   |
| BK | 0.0068±0.0002 <sup>b</sup>   | 2167±83 <sup>d</sup> <sup>e</sup> | 0.1±0.02 <sup>a</sup>  | 0.032±0.001 <sup>d</sup>   | 0.47±0.01 <sup>b</sup>   | 0.012±0.002 <sup>ab</sup>  | 10±0.3 <sup>b</sup>   | 0.42±0.03 <sup>cd</sup>  |
| BV | 0.0064±0.0001 <sup>b</sup>   | 1843±46 <sup>e</sup>              | 0.09±0.01 <sup>a</sup> | 0.054±0.002 <sup>b</sup>   | 0.43±0.01 <sup>c</sup>   | 0.0068±0.0003 <sup>c</sup> | 12.2±0.1 <sup>a</sup> | 0.61±0.04 <sup>a</sup>   |
| GK | 0.0068±0.0001 <sup>b</sup>   | 4865±933 <sup>b</sup>             | 0.09±0.01 <sup>a</sup> | 0.037±0.002 <sup>cd</sup>  | 0.49±0.03 <sup>b</sup>   | 0.0145±0.0003 <sup>a</sup> | 9.8±0.2 <sup>b</sup>  | 0.46±0.03 <sup>bc</sup>  |
| OA | 0.0066±0.0002 <sup>b</sup>   | 10582±845 <sup>a</sup>            | 0.09±0.02 <sup>a</sup> | 0.0669±0.0002 <sup>a</sup> | 0.46±0.01 <sup>bc</sup>  | 0.0059±0.0004 <sup>c</sup> | 13.4±0.5 <sup>a</sup> | 0.36±0.02 <sup>cde</sup> |
| OK | 0.00658±0.00004 <sup>b</sup> | 3300±100 <sup>cd</sup>            | 0.1±0.004 <sup>a</sup> | 0.04±0.001 <sup>c</sup>    | 0.64±0.02 <sup>a</sup>   | 0.011±0.001 <sup>b</sup>   | 6.2±0.2 <sup>d</sup>  | 0.56±0.08 <sup>ab</sup>  |
| WV | 0.0065±0.0001 <sup>b</sup>   | 4171±117 <sup>bc</sup>            | 0.09±0.03 <sup>a</sup> | 0.019±0.001 <sup>f</sup>   | 0.337±0.005 <sup>d</sup> | 0.0021±0.0003 <sup>d</sup> | 8±1 <sup>c</sup>      | 0.31±0.03 <sup>de</sup>  |
| YK | 0.0083±0.0003 <sup>a</sup>   | 955±16 <sup>e</sup>               | 0.08±0.01 <sup>a</sup> | 0.025±0.001 <sup>e</sup>   | 0.49±0.01 <sup>b</sup>   | 0.011±0.002 <sup>b</sup>   | 7.8±0.1 <sup>c</sup>  | 0.44±0.06 <sup>bc</sup>  |

**Table S6.** Principal Component Analysis. Eigenvalues, explained and cumulative variance.

|                    | Principal components |             |             |              |
|--------------------|----------------------|-------------|-------------|--------------|
|                    | 1                    | 2           | 3           | 4            |
| Variance explained |                      |             |             |              |
| Eigenvalues        | 2.1628               | 1.7346      | 1.5664      | 1.4417       |
| % of variance      | 33.41                | 21.49       | 17.53       | 14.85        |
| Cumulative %       | 33.41                | 54.90       | 72.43       | 87.28        |
| Factor loadings    |                      |             |             |              |
| Ag                 | 0.28049824           | 0.36058523  | 0.22884688  | −0.042919712 |
| Al                 | −0.06857495          | 0.20315907  | −0.43063114 | −0.379488950 |
| As                 | −0.05121064          | −0.05518212 | −0.34705801 | 0.405466724  |
| Cd                 | −0.30325016          | 0.04696802  | −0.24139784 | 0.146971960  |
| Co                 | −0.25628014          | −0.39362905 | −0.01490130 | −0.270990788 |
| Cr                 | 0.35550861           | −0.16782308 | −0.31146292 | 0.087988620  |
| Cu                 | −0.24463488          | −0.42969637 | 0.03129423  | 0.239449497  |
| Fe                 | −0.38800631          | 0.01130980  | 0.28401777  | −0.002918325 |
| Hg                 | 0.19529704           | 0.02514386  | −0.10527404 | 0.551485455  |
| Mn                 | 0.41142592           | −0.10611255 | −0.17327520 | −0.170903102 |
| Ni                 | −0.37176084          | 0.01307610  | −0.26669372 | −0.088626259 |
| Pb                 | 0.15622500           | −0.50341793 | −0.16973290 | 0.040373604  |
| Se                 | 0.20308896           | −0.35947861 | 0.06333031  | −0.405176820 |
| Zn                 | −0.09112794          | 0.24669975  | −0.50944547 | −0.150407636 |

**Table S7.** Estimated hazard quotient (HQ) and hazard index (HI) of exposure to elements from consumption of Tschanara Tea Garden teas by European consumers.

| Element | BA                   | BK                   | BV                   | GK                   | OA                   | OK                   | VW                   | YK                   |
|---------|----------------------|----------------------|----------------------|----------------------|----------------------|----------------------|----------------------|----------------------|
|         | HQ                   |                      |                      |                      |                      |                      |                      |                      |
| Ag      | $6.3 \times 10^{-6}$ | $6.5 \times 10^{-6}$ | $6.1 \times 10^{-6}$ | $6.5 \times 10^{-6}$ | $6.4 \times 10^{-6}$ | $6.3 \times 10^{-6}$ | $6.3 \times 10^{-6}$ | $7.9 \times 10^{-6}$ |
| Al      | $4.0 \times 10^{-2}$ | $5.2 \times 10^{-2}$ | $4.4 \times 10^{-2}$ | $1.2 \times 10^{-1}$ | $2.5 \times 10^{-1}$ | $7.9 \times 10^{-2}$ | $1.0 \times 10^{-1}$ | $2.3 \times 10^{-2}$ |
| As      | $2.2 \times 10^{-4}$ | $2.3 \times 10^{-4}$ | $2.1 \times 10^{-4}$ | $2.1 \times 10^{-4}$ | $2.0 \times 10^{-4}$ | $2.2 \times 10^{-4}$ | $2.0 \times 10^{-4}$ | $1.8 \times 10^{-4}$ |
| Cd      | $3.4 \times 10^{-4}$ | $1.5 \times 10^{-4}$ | $2.6 \times 10^{-4}$ | $1.8 \times 10^{-4}$ | $3.2 \times 10^{-4}$ | $1.9 \times 10^{-4}$ | $9.3 \times 10^{-5}$ | $1.2 \times 10^{-4}$ |
| Co      | $8.5 \times 10^{-6}$ | $1.4 \times 10^{-5}$ | $4.0 \times 10^{-5}$ | $9.1 \times 10^{-6}$ | $1.7 \times 10^{-5}$ | $9.8 \times 10^{-6}$ | $2.4 \times 10^{-5}$ | $7.6 \times 10^{-6}$ |
| Cr      | $5.5 \times 10^{-4}$ | $7.6 \times 10^{-4}$ | $6.9 \times 10^{-4}$ | $7.8 \times 10^{-4}$ | $7.4 \times 10^{-4}$ | $1.0 \times 10^{-3}$ | $5.4 \times 10^{-4}$ | $7.8 \times 10^{-4}$ |
| Cu      | $1.3 \times 10^{-4}$ | $1.2 \times 10^{-4}$ | $1.6 \times 10^{-4}$ | $1.2 \times 10^{-4}$ | $1.1 \times 10^{-4}$ | $1.1 \times 10^{-4}$ | $1.1 \times 10^{-4}$ | $1.1 \times 10^{-4}$ |
| Fe      | $3.7 \times 10^{-4}$ | $2.3 \times 10^{-4}$ | $3.3 \times 10^{-4}$ | $2.4 \times 10^{-4}$ | $2.8 \times 10^{-4}$ | $2.2 \times 10^{-4}$ | $2.9 \times 10^{-4}$ | $2.7 \times 10^{-4}$ |
| Hg      | $8.6 \times 10^{-5}$ | $1.0 \times 10^{-4}$ | $5.7 \times 10^{-5}$ | $1.2 \times 10^{-4}$ | $4.9 \times 10^{-5}$ | $9.0 \times 10^{-5}$ | $1.8 \times 10^{-5}$ | $9.3 \times 10^{-5}$ |
| Mn      | $2.5 \times 10^{-2}$ | $4.2 \times 10^{-2}$ | $3.6 \times 10^{-2}$ | $4.8 \times 10^{-2}$ | $4.6 \times 10^{-2}$ | $7.3 \times 10^{-2}$ | $4.6 \times 10^{-2}$ | $5.2 \times 10^{-2}$ |
| Ni      | $2.4 \times 10^{-3}$ | $2.4 \times 10^{-3}$ | $2.9 \times 10^{-3}$ | $2.3 \times 10^{-3}$ | $3.2 \times 10^{-3}$ | $1.5 \times 10^{-3}$ | $2.0 \times 10^{-3}$ | $1.9 \times 10^{-3}$ |
| Pb      | $3.3 \times 10^{-4}$ | $5.7 \times 10^{-4}$ | $8.2 \times 10^{-4}$ | $6.2 \times 10^{-4}$ | $4.8 \times 10^{-4}$ | $7.5 \times 10^{-4}$ | $4.2 \times 10^{-4}$ | $5.9 \times 10^{-4}$ |
| Se      | $2.9 \times 10^{-5}$ | $2.9 \times 10^{-5}$ | $4.4 \times 10^{-5}$ | $3.6 \times 10^{-5}$ | $3.8 \times 10^{-5}$ | $4.6 \times 10^{-5}$ | $4.2 \times 10^{-5}$ | $4.3 \times 10^{-5}$ |
| Zn      | $3.6 \times 10^{-4}$ | $5.3 \times 10^{-4}$ | $3.5 \times 10^{-4}$ | $3.9 \times 10^{-4}$ | $6.1 \times 10^{-4}$ | $3.8 \times 10^{-4}$ | $3.8 \times 10^{-4}$ | $3.1 \times 10^{-4}$ |
|         | HI                   |                      |                      |                      |                      |                      |                      |                      |
| All     | $7.0 \times 10^{-2}$ | $9.9 \times 10^{-2}$ | $8.6 \times 10^{-2}$ | $1.7 \times 10^{-1}$ | $3.1 \times 10^{-1}$ | $1.6 \times 10^{-1}$ | $1.5 \times 10^{-1}$ | $7.9 \times 10^{-2}$ |
